# Supplementary material
Source: PubMed Central journal article supplement (PMC4383661)
Supplement: NIHMS653218-supplement-1.pdf [file NIHMS653218-supplement-1.pdf]

## SUPPLEMENTAL MATERIAL

**Supplemental Table 1.** Heart Failure Classification<sup>a</sup>

| Cardiac Score                          | ARIC Questions                                                                                                                                                                                                                                                                                                                                                                                                                                                                       | JHS Variables                                                                                                                                                                                                                                                                                                                                                                                                                                                                                                                                                                                                                            |
|----------------------------------------|--------------------------------------------------------------------------------------------------------------------------------------------------------------------------------------------------------------------------------------------------------------------------------------------------------------------------------------------------------------------------------------------------------------------------------------------------------------------------------------|------------------------------------------------------------------------------------------------------------------------------------------------------------------------------------------------------------------------------------------------------------------------------------------------------------------------------------------------------------------------------------------------------------------------------------------------------------------------------------------------------------------------------------------------------------------------------------------------------------------------------------------|
| Prior coronary heart disease (1 point) | Positive response to “Has a doctor ever said you had a heart attack?”                                                                                                                                                                                                                                                                                                                                                                                                                | Positive history or response to any of the questions (Note: Verified that the JHS derived variable CHDhx=1 can be substituted for items a-e below):<br>PFHA4A: Has doctor said you had heart attack (missing at exam 2)?<br>MHXA16/17: Saw a doctor because of chest pain? What did the doctor say it was? (H=Heart Attack)<br>MHXA30/31: Saw a doctor because of this pain? What did the doctor say it was? (H=Heart Attack)<br>MHXA32: Hospitalized for heart attack a week+? MI from ECG (missing at exam 2)<br>MHXA52A: Have a coronary bypass?<br>MHXA54A: Ever had angioplasty of coronary arteries?                               |
| Prior angina pectoris (1 point)        | Positive response to all:<br><ul style="list-style-type: none"> <li>• “Have you ever had any pain or discomfort in your chest?”</li> <li>• “Do you get it when you walk uphill or hurry?” or “Do you get it when you walk at an ordinary pace on the level?”</li> </ul> Response of “stop or slow down” to “What do you do if you get it while you are walking?”<br>Response of “relieved” to “If you stand still, what happens?”<br>Response of “10 minutes or less” to “How soon?” | Positive response to either series of questions:<br>1) MHXA16:/17 Saw a doctor because of chest pain? What did the doctor say it was? (A=Angina) <i>or</i><br>2) Positive response to <u>ALL</u> of the questions:<br>MHXA8: Ever had any pain/discomfort in chest?<br>MHXA9: ‘Chest pain walking up hill?’ <i>or</i><br>MHXA10: ‘Chest pain walking at ordinary pace on level?’<br>MHXA11: What do you do if you get chest pain while you are walking? Response=S (Stop or slow down)<br>MHXA12: If you stand still, what happens? Response=R (Relieved)<br>MHXA13: Time required for relief of chest pain. Response=L (10 min or less) |
| Swollen legs at end of day (1 point)   | Positive response to both:<br><ul style="list-style-type: none"> <li>• “Have you ever had swelling of your feet or ankles (excluding pregnancy)?”</li> <li>• “Did it tend to come on during the day and go down overnight?”</li> </ul>                                                                                                                                                                                                                                               | Positive response to both questions:<br>MHXA49: Ever have swelling of the feet or ankles?<br>MHXA50: Swelling come during day, go down overnight?                                                                                                                                                                                                                                                                                                                                                                                                                                                                                        |

| Cardiac Score                                      | ARIC Questions                                                                                                                                                                                                                                          | JHS Variables                                                                                                                                                                                |
|----------------------------------------------------|---------------------------------------------------------------------------------------------------------------------------------------------------------------------------------------------------------------------------------------------------------|----------------------------------------------------------------------------------------------------------------------------------------------------------------------------------------------|
| Nocturnal dyspnea (1 point)                        | Positive response to “Have you ever been awakened at night by trouble breathing?”                                                                                                                                                                       | Positive response to:<br>MHXA48: Ever awakened by trouble breathing?                                                                                                                         |
| Pulmonary rales at physical exam                   | Not applicable                                                                                                                                                                                                                                          | Not applicable                                                                                                                                                                               |
| Atrial fibrillation on ECG (1 point)               | Not applicable                                                                                                                                                                                                                                          | JHS analysis variable afib=1 (Derived from ECGA15: Arrhythmia Minnesota code 8-3-1 [value=1]).                                                                                               |
| Pulmonary disease score                            |                                                                                                                                                                                                                                                         |                                                                                                                                                                                              |
| History of chronic bronchitis (1 point)            | Positive response “Have you ever had chronic bronchitis?”                                                                                                                                                                                               | Positive response to:<br>PFHA9A: Doctor said you have chronic lung disease?                                                                                                                  |
| History of asthma (1 point)                        | Positive response to “Have you even had chronic asthma?”                                                                                                                                                                                                | Positive response to any series of questions:<br>PFHA10A: Has the doctor said you have asthma?<br>RPAA13: Have you ever had asthma? and<br>RPAA14: Was it confirmed by a doctor?             |
| History of coughing, phlegm, or wheezing (1 point) | Positive response to any: <ul style="list-style-type: none"> <li>• “Do you usually have a cough?”</li> <li>• “Do you usually bring up phlegm from your chest?”</li> <li>• “Does your chest ever sound wheezy or whistling apart from colds?”</li> </ul> | Positive response to any:<br>RPAA1: Do you usually have a cough?<br>RPAA6: Bring up phlegm, 3+ months?<br>RPAA8: Chest ever sound wheezy w/out cold?<br>RPAA9: Chest sound wheezy most days? |
| Presence of rhonchi at physical exam               | Not applicable                                                                                                                                                                                                                                          | Not applicable                                                                                                                                                                               |
| Therapy score                                      |                                                                                                                                                                                                                                                         |                                                                                                                                                                                              |
| History of digitalis administration (1 point)      | Medication codes (312xxx)                                                                                                                                                                                                                               | Search medications for digitalis drug code = cardiac glycosides (TC 312xxx)                                                                                                                  |
| History of diuretic administration (1 point)       | Medication codes (37xxxx)                                                                                                                                                                                                                               | Search medications for drug class: Diuretics (Loop diuretics, mercurial diuretics, osmotic diuretics, potassium sparing diuretics; TC 37xxxx)                                                |

<sup>a</sup> Gothenburg is a point system that assigns heart failure grades based on cardiac, pulmonary, and drug therapy component scores. The following grades are assigned: 0 (heart failure absent) if all 3 scores are 0; 1 (latent) if cardiac score greater than 0 and pulmonary and therapy scores equal 0; 2 (manifest heart failure) if cardiac score greater than 0 and either pulmonary or therapy score greater than 0; 3 if cardiac score greater than 0 and both pulmonary and therapy scores greater than 0; and 4 if the patient died in heart failure. For the current study, we ascertained heart failure based on grade 3.

**Supplemental Table 2.** Baseline Characteristics of the Study Population Stratified by Severity of Conduction Delay

| Characteristic                               | Severity of Conduction Delay |                                |                            | P Value |
|----------------------------------------------|------------------------------|--------------------------------|----------------------------|---------|
|                                              | Mild<br>(QRS 100-119 msec)   | Moderate<br>(QRS 120-149 msec) | Severe<br>(QRS ≥ 150 msec) |         |
| No. of participants                          | 1360                         | 88                             | 80                         |         |
| Age, median (IQR), y                         | 58.1 (47.6-66.3)             | 66.5 (59.6-73.0)               | 68.9 (63.0-73.4)           | < .001  |
| Male sex, No. (%)                            | 669 (49.2)                   | 42 (47.7)                      | 41 (51.3)                  | < .001  |
| Medical history, No. (%)                     |                              |                                |                            |         |
| Atrial fibrillation                          | 10 (0.7)                     | 1 (1.1)                        | 0 (0.0)                    | .02     |
| Chronic lung disease                         | 102 (7.5)                    | 11 (12.5)                      | 8 (10.0)                   | .15     |
| Diabetes mellitus                            | 312 (22.9)                   | 33 (37.5)                      | 30 (37.5)                  | < .001  |
| Heart failure                                | 126 (9.3)                    | 11 (12.5)                      | 16 (20.0)                  | < .001  |
| Hypertension                                 | 919 (67.6)                   | 69 (78.4)                      | 66 (82.5)                  | < .001  |
| Myocardial infarction                        | 88 (6.5)                     | 12 (13.6)                      | 17 (21.3)                  | < .001  |
| Smoker currently                             | 185 (13.6)                   | 9 (10.2)                       | 11 (13.8)                  | .73     |
| Smoker previously                            | 312 (22.9)                   | 22 (25.0)                      | 19 (23.8)                  | < .001  |
| Stroke                                       | 56 (4.1)                     | 6 (6.8)                        | 9 (11.3)                   | .01     |
| Physical examination, median (IQR)           |                              |                                |                            |         |
| Body mass index, kg/m <sup>2</sup>           | 31.4 (27.7-36.5)             | 30.6 (27.6-34.7)               | 31.1 (27.8-35.4)           | < .001  |
| Pulse, beats/min                             | 62.0 (56.0-70.0)             | 64.0 (56.5-71.0)               | 64.5 (55.0-70.5)           | < .001  |
| Systolic blood pressure, mm Hg               | 125.0 (115.0-138.0)          | 132.0 (123.0-141.5)            | 135.0 (123.5-148.5)        | < .001  |
| Laboratory test results, median (IQR)        |                              |                                |                            |         |
| eGFR, mL/min/1.73 m <sup>2</sup>             | 85.9 (76.0-96.0)             | 82.5 (69.5-91.5)               | 76.4 (59.6-85.9)           | < .001  |
| Glucose, mg/dL                               | 93.0 (87.0-104.0)            | 94.5 (88.0-104.0)              | 98.0 (90.0-115.5)          | < .001  |
| Hemoglobin, g/dL                             | 13.2 (12.4-14.3)             | 13.0 (12.0-14.4)               | 12.8 (11.9-13.5)           | < .001  |
| Low-density lipoprotein, mg/dL               | 124.0 (102.0-147.0)          | 121.0 (94.5-143.5)             | 123.5 (103.0-147.0)        | .67     |
| Serum potassium, mEq/L                       | 4.3 (4.0-4.5)                | 4.3 (4.0-4.6)                  | 4.3 (4.0-4.5)              | .32     |
| Serum sodium, mEq/L                          | 141.0 (139.0-142.0)          | 141.0 (140.0-142.5)            | 141.0 (139.0-143.0)        | .001    |
| Cardiac test results                         |                              |                                |                            |         |
| Complete LBBB, No. (%)                       | 0                            | 19 (21.6)                      | 33 (41.3)                  | < .001  |
| Complete RBBB, No. (%)                       | 1 (0.1)                      | 30 (34.1)                      | 33 (41.3)                  | < .001  |
| Other IV conduction Defect, No. (%)          | 79 (5.8)                     | 39 (44.3)                      | 14 (17.5)                  | < .001  |
| Ejection fraction, mean (SD), %              | 61.0 (8.3)                   | 59.8 (11.1)                    | 57.7 (13.5)                | < .001  |
| Ejection fraction < 40%, No. (%)             | 24 (1.8)                     | 3 (3.4)                        | 8 (10.0)                   | < .001  |
| Left ventricular dimension, median (IQR), cm | 49.3 (46.9-52.3)             | 50.6 (46.5-53.7)               | 49.0 (47.9-53.4)           | < .001  |
| Left ventricular hypertrophy, No. (%)        | 141 (10.4)                   | 14 (15.9)                      | 11 (13.8)                  | < .001  |
| Medications, No. (%)                         |                              |                                |                            |         |

| Characteristic          | Severity of Conduction Delay |                                |                            | <i>P</i><br>Value |
|-------------------------|------------------------------|--------------------------------|----------------------------|-------------------|
|                         | Mild<br>(QRS 100-119 msec)   | Moderate<br>(QRS 120-149 msec) | Severe<br>(QRS ≥ 150 msec) |                   |
| ACE inhibitor/ARB       | 251 (18.5)                   | 21 (23.9)                      | 30 (37.5)                  | < .001            |
| Anti-arrhythmic agent   | 8 (0.6)                      | 3 (3.4)                        | 1 (1.3)                    | < .001            |
| Antiplatelet agent      | 30 (2.2)                     | 2 (2.3)                        | 2 (2.5)                    | .06               |
| β-Blocker               | 160 (11.8)                   | 13 (14.8)                      | 16 (20.0)                  | < .001            |
| Calcium channel blocker | 313 (23.0)                   | 21 (23.9)                      | 23 (28.8)                  | < .001            |
| Digoxin                 | 32 (2.4)                     | 7 (8.0)                        | 7 (8.8)                    | < .001            |
| Diuretic                | 358 (26.3)                   | 37 (42.0)                      | 35 (43.8)                  | < .001            |
| Insulin                 | 95 (7.0)                     | 11 (12.5)                      | 15 (18.8)                  | < .001            |
| Oral diabetic agent     | 138 (10.1)                   | 22 (25.0)                      | 12 (15.0)                  | < .001            |
| Statin                  | 169 (12.4)                   | 19 (21.6)                      | 19 (23.8)                  | < .001            |

Abbreviations: ACE, angiotensin-converting enzyme; ARB, angiotensin II receptor blocker; eGFR, estimated glomerular filtration rate.

**Supplemental Table 3. Outcomes Stratified by Severity of Conduction Delay**

| Outcome                                                                   | Severity of Conduction Delay |                            |                        | <i>P</i><br>Value |
|---------------------------------------------------------------------------|------------------------------|----------------------------|------------------------|-------------------|
|                                                                           | Mild<br>(100-119 msec)       | Moderate<br>(120-149 msec) | Severe<br>(≥ 150 msec) |                   |
| Mortality, No. (cumulative incidence <sup>a</sup> )                       | 147 (11.2)                   | 13 (14.9)                  | 26 (33.7)              | < .001            |
| 95% CI                                                                    | 9.6-13.1                     | 9.0-24.6                   | 24.5-46.3              |                   |
| Mode of death, No. (%)                                                    |                              |                            |                        |                   |
| Cardiac mortality                                                         | 75 (51.0)                    | 6 (46.2)                   | 16 (61.5)              | .13               |
| 95% CI                                                                    | 42.7-59.3                    | 19.2-74.9                  | 40.6-79.8              |                   |
| Sudden cardiac death                                                      | 12 (8.2)                     | 0 (0.0)                    | 3 (11.5)               | .07               |
| 95% CI                                                                    | 4.3-13.8                     | —                          | 6.6-39.4               |                   |
| Heart failure or cardiomyopathy                                           | 4 (2.7)                      | 1 (7.7)                    | 5 (19.2)               | .004              |
| 95% CI                                                                    | 0.7-6.8                      | 0.2-36.0                   | 6.6-39.4               |                   |
| Noncardiovascular mortality                                               | 72 (49.0)                    | 7 (53.8)                   | 10 (38.5)              | .13               |
| 95% CI                                                                    | 40.7-57.3                    | 25.1-80.8                  | 20.2-59.4              |                   |
| Heart failure hospitalization,<br>No. (cumulative incidence) <sup>b</sup> | 86 (6.7)                     | 9 (11.2)                   | 23 (33.4)              | < .001            |
| 95% CI                                                                    | 5.4-8.2                      | 6.0-20.8                   | 23.8-47.0              |                   |

a Cumulative incidence of death within 8 years after exam 1.

b Calculated among the 5065 participants who survived to January 1, 2005, when heart failure hospitalization surveillance began.

**Supplemental Table 4.** Baseline Characteristics of Participants Who Completed Exam 3 and Had Normal Conduction at Baseline

| Characteristic                             | Participants<br>(n = 2599) |
|--------------------------------------------|----------------------------|
| Age, median (IQR), y                       | 53.0 (44.2-62.2)           |
| Male sex, No. (%)                          | 799 (30.7)                 |
| Medical history, No. (%)                   |                            |
| Atrial fibrillation                        | 4 (0.2)                    |
| Chronic lung disease                       | 168 (6.5)                  |
| Diabetes mellitus                          | 452 (17.4)                 |
| Heart failure                              | 130 (5.0)                  |
| Hypertension                               | 1,432 (55.1)               |
| Myocardial infarction                      | 86 (3.3)                   |
| Smoking status                             |                            |
| Current smoker                             | 287 (11.0)                 |
| Prior smoker                               | 429 (16.5)                 |
| Stroke                                     | 74 (2.8)                   |
| Physical examination results, median (IQR) |                            |
| Body mass index, kg/m <sup>2</sup>         | 30.2 (26.6-35.1)           |
| Pulse, beats/min                           | 63.0 (57.0-71.0)           |
| Systolic blood pressure, mm Hg             | 123.0 (113.0-134.0)        |
| Laboratory test results, median (IQR)      |                            |
| eGFR, mL/min/1.73 m <sup>2</sup>           | 86.7 (76.8-97.3)           |
| Glucose, mg/dL                             | 91.0 (85.0-99.0)           |
| Hemoglobin, g/dL                           | 13.0 (12.1-13.8)           |
| Low-density lipoprotein, mg/dL             | 124.0 (102.0-147.0)        |
| Potassium, mEq/L                           | 4.3 (4.0-4.5)              |
| Sodium, mEq/L                              | 140.0 (139.0-142.0)        |
| Uric acid, mg/dL                           | 5.2 (4.2-6.2)              |
| Cardiac test results                       |                            |
| Ejection fraction, %                       |                            |
| Mean (SD)                                  | 62.5 (6.5)                 |
| Median (IQR)                               | 65.0 (55.0-65.0)           |

| Characteristic                               | Participants<br>(n = 2599) |
|----------------------------------------------|----------------------------|
| Ejection fraction < 40%, No. (%)             | 3 (0.1)                    |
| Left ventricular dimension, median (IQR), cm | 48.1 (45.3-50.3)           |
| Left ventricular hypertrophy, No. (%)        | 138 (5.3)                  |
| Medications, No. (%)                         |                            |
| ACE inhibitor/ARB                            | 349 (13.4)                 |
| Anti-arrhythmic agent                        | 2 (0.1)                    |
| Antiplatelet agent                           | 24 (0.9)                   |
| $\beta$ -Blocker                             | 211 (8.1)                  |
| Calcium channel blocker                      | 405 (15.6)                 |
| Digoxin                                      | 11 (0.4)                   |
| Diuretic                                     | 492 (18.9)                 |
| Insulin                                      | 99 (3.8)                   |
| Oral diabetic agent                          | 242 (9.3)                  |
| Statin                                       | 257 (9.9)                  |

Abbreviations: ACE, angiotensin-converting enzyme; ARB, angiotensin II receptor blocker; eGFR, estimated glomerular filtration rate; IQR, interquartile range.
